# Supplementary material
Source: PubMed Central journal article supplement (PMC3158721)
Supplement: supp_blood-2011-02-338061_Document1.pdf [file supp_blood-2011-02-338061_Document1.pdf]

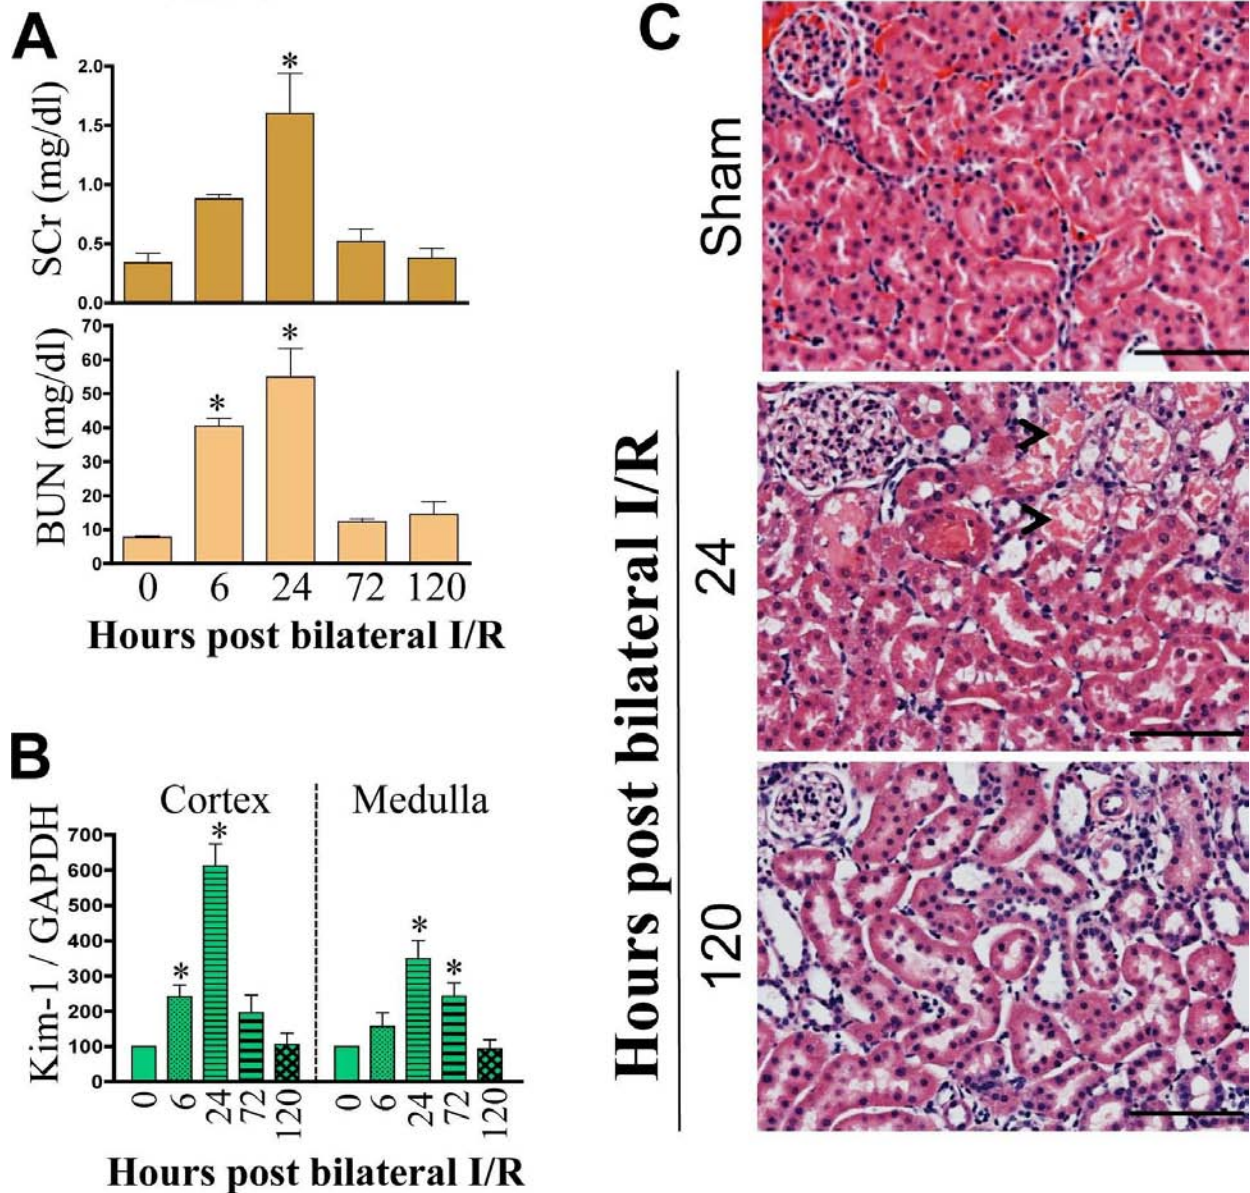

**Figure S1.** Male Wistar rats were subjected to 20-min bilateral ischemia/reperfusion and assessed for kidney injury parameters (A) Serum creatinine and BUN measurements in the plasma (B) RT-PCR of *Kim-1* gene expression in cortex and medulla and (C) representative histology sections comparing rat kidney sections of healthy versus injured following 24 and 120 h of reperfusion. n=5/group

\* represents  $p < 0.05$  as determined by one way ANOVA in comparison with sham rats. Bar represents 100 $\mu$ m.

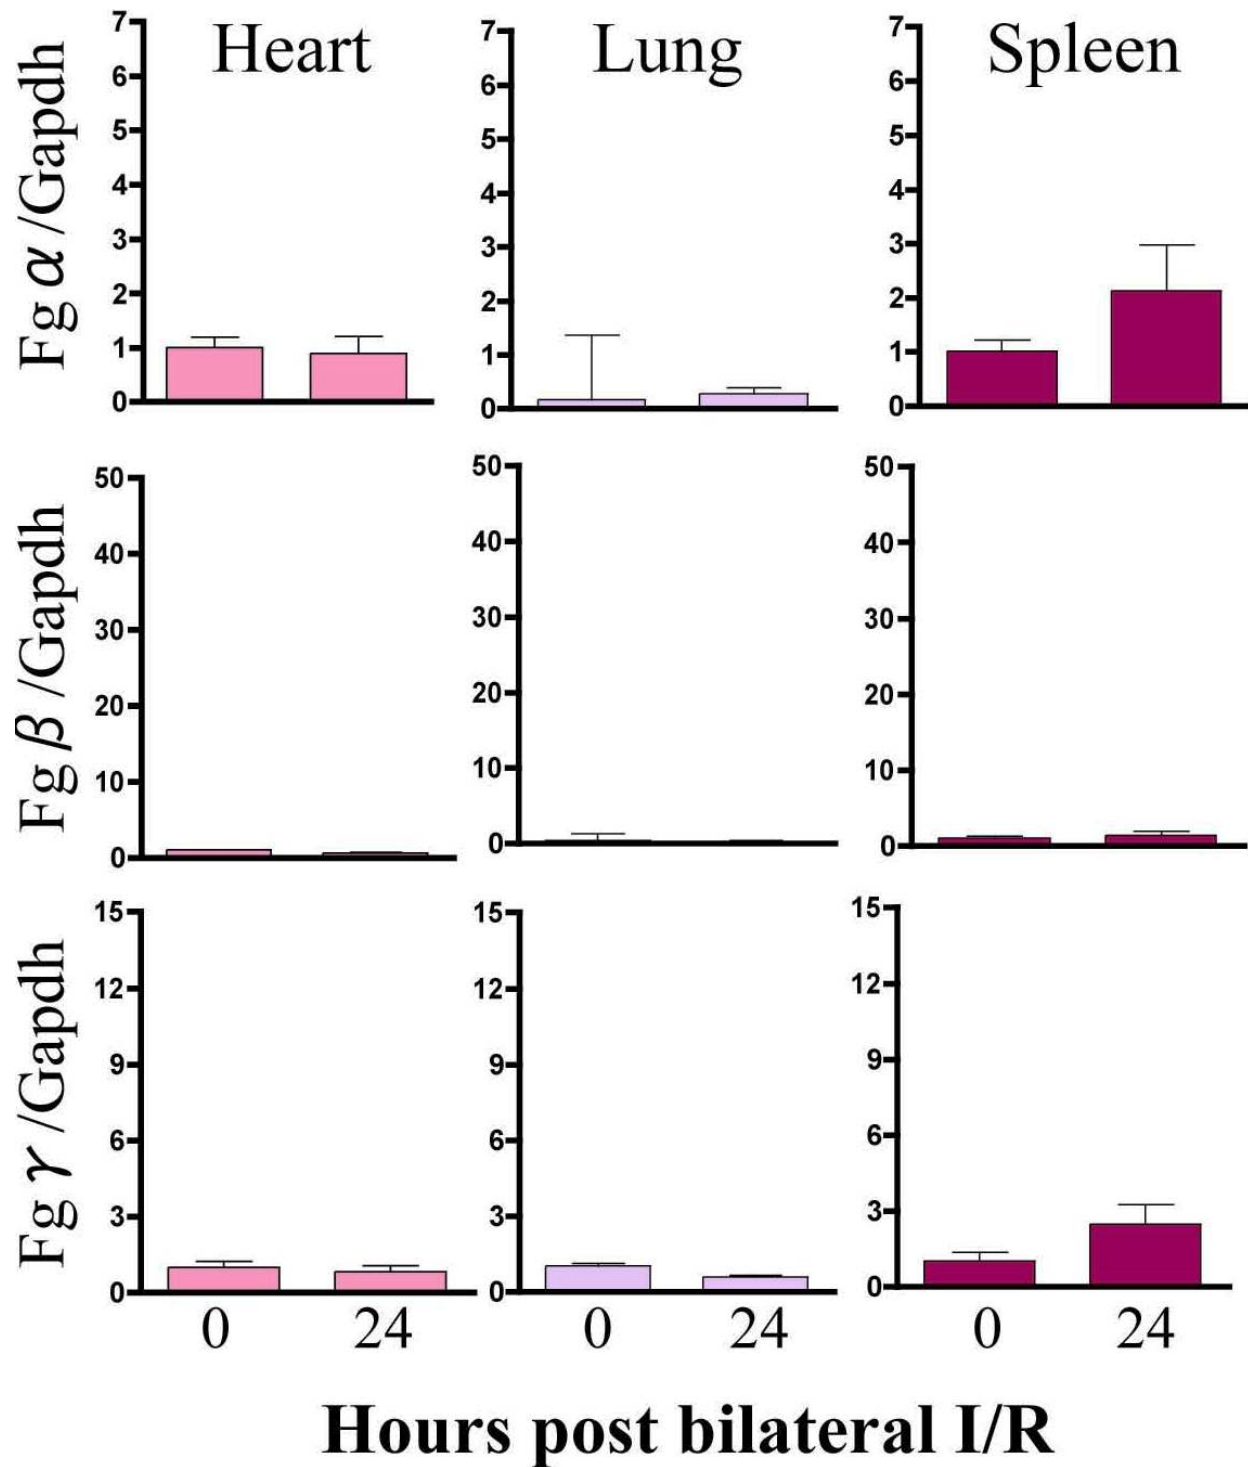

**Figure S2.** Real-time PCR analysis for Fg $\alpha$ , Fg $\beta$ , and Fg $\gamma$  chain gene expression in heart, lung, and spleen collected from male Wistar rats subjected to 20 min bilateral ischemia, followed by reperfusion for 6, 24, 72, and 120 h and compared with healthy (sham) rats (n=5/group/time point)

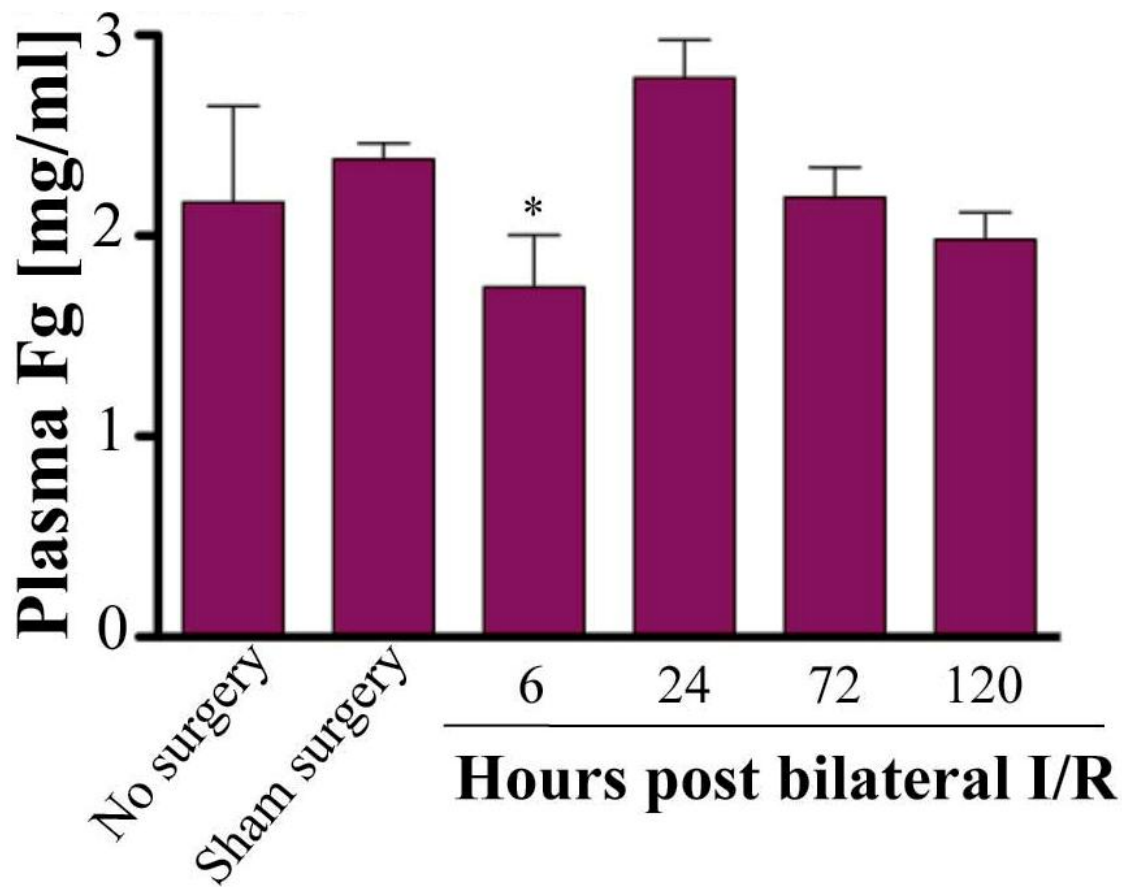

**Figure S3. Plasma levels of fibrinogen measured in male Wistar rats that did not undergo any surgery, sham rats, and rats subjected to 20 min bilateral ischemia followed by reperfusion (n=5/group/time point)**

\* represents  $p < 0.05$  as determined by one way ANOVA in comparison with sham rats.

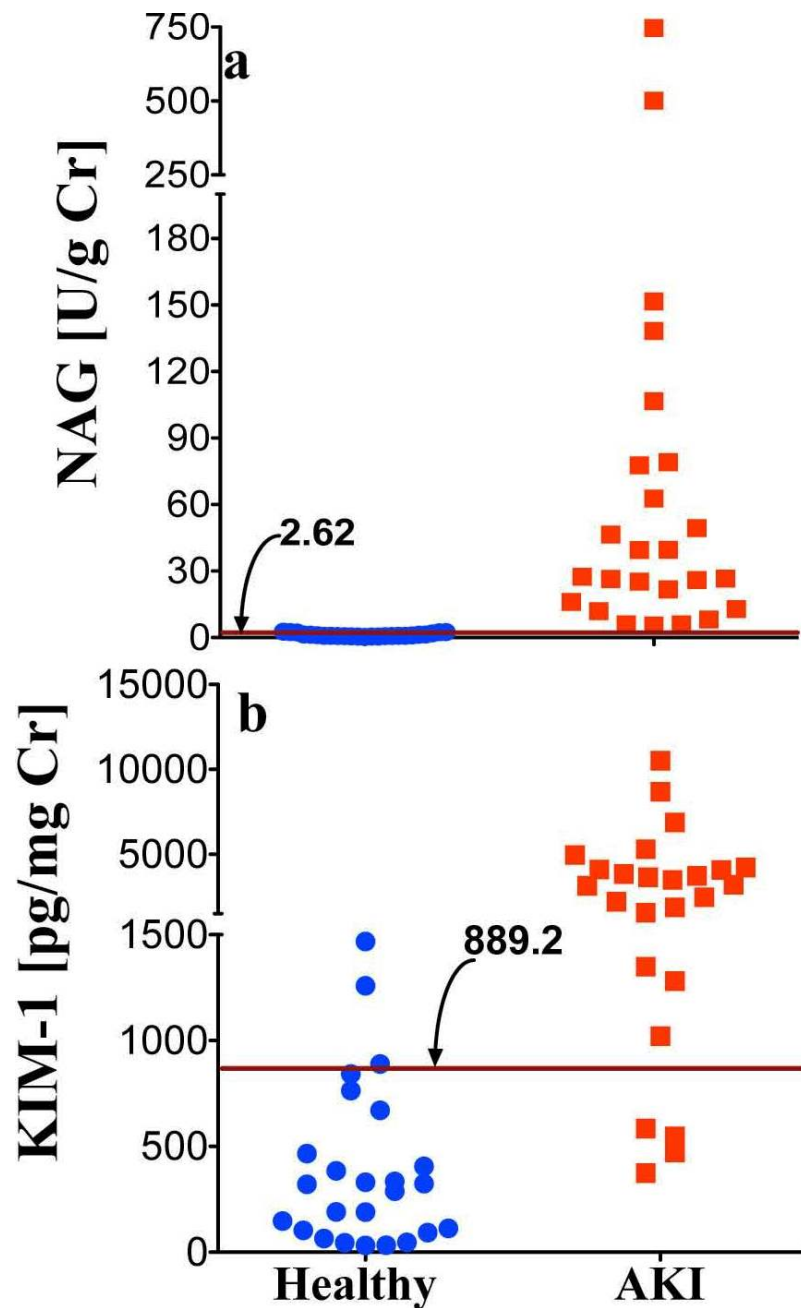

**Figure S4. Urinary N-acetyl- $\beta$ -glucosaminidase (NAG) and kidney injury molecule-1 (KIM-1) were measured in a human cross-sectional study with clinically established multifactorial acute kidney injury (AKI) or chronic kidney disease (CKD) (n=25) versus healthy volunteers (n=25)**

Magenta line and corresponding number marked by arrow indicates a threshold cut off value at 95 % specificity.

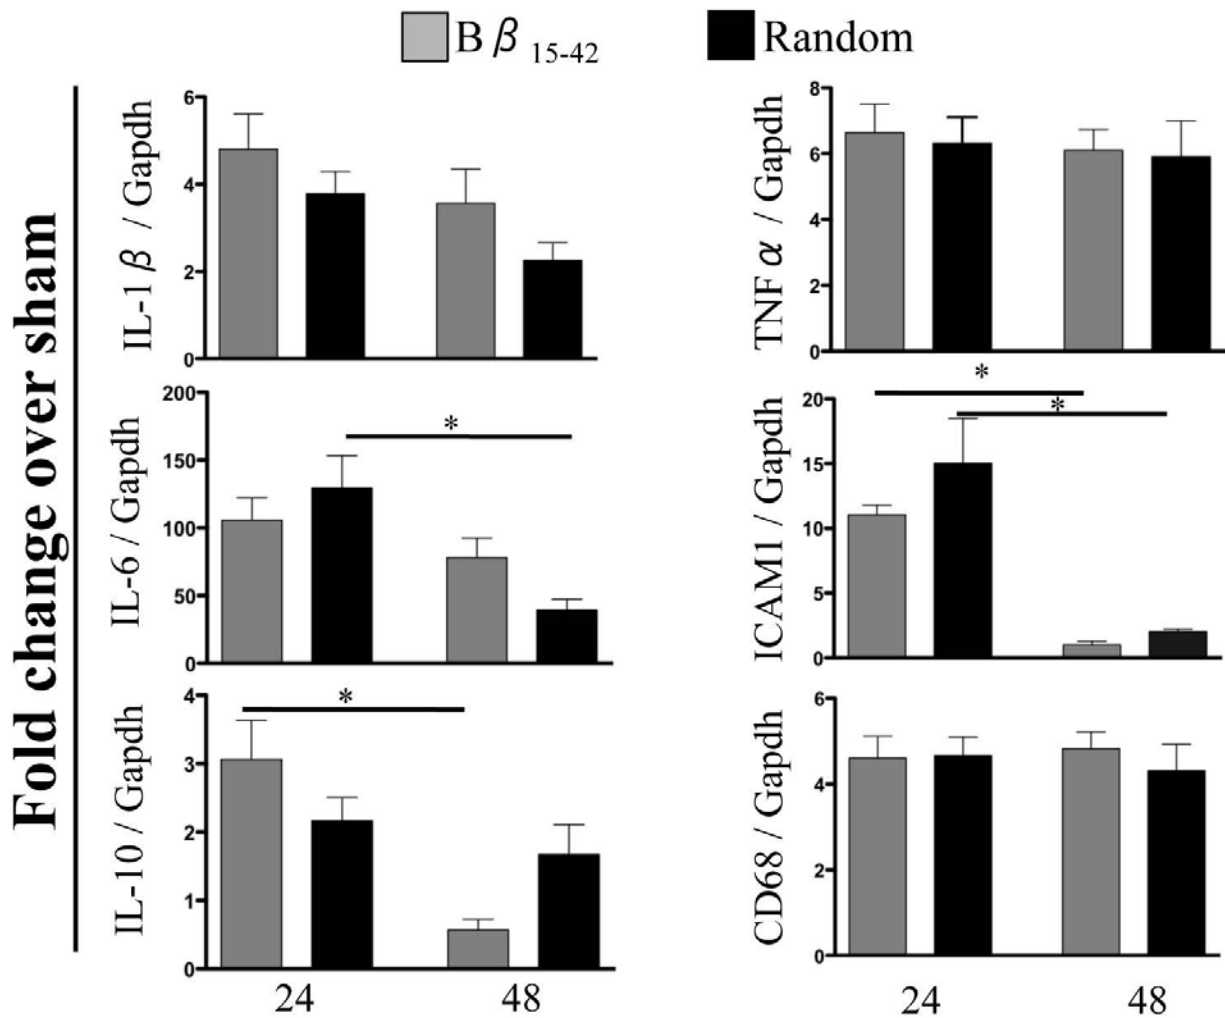

**Figure S5. Real-time-PCR for candidate markers of inflammation in kidney of mice subjected to 27 min bilateral ischemia, followed by reperfusion for 24 and 48 hours that were administered either 3.6 mg/kg of  $B\beta_{15-42}$  or random peptide intravenously (n=5/group/time point)**

\* represents p<0.05 as determined by Student's t-test between the two groups within the same time point.

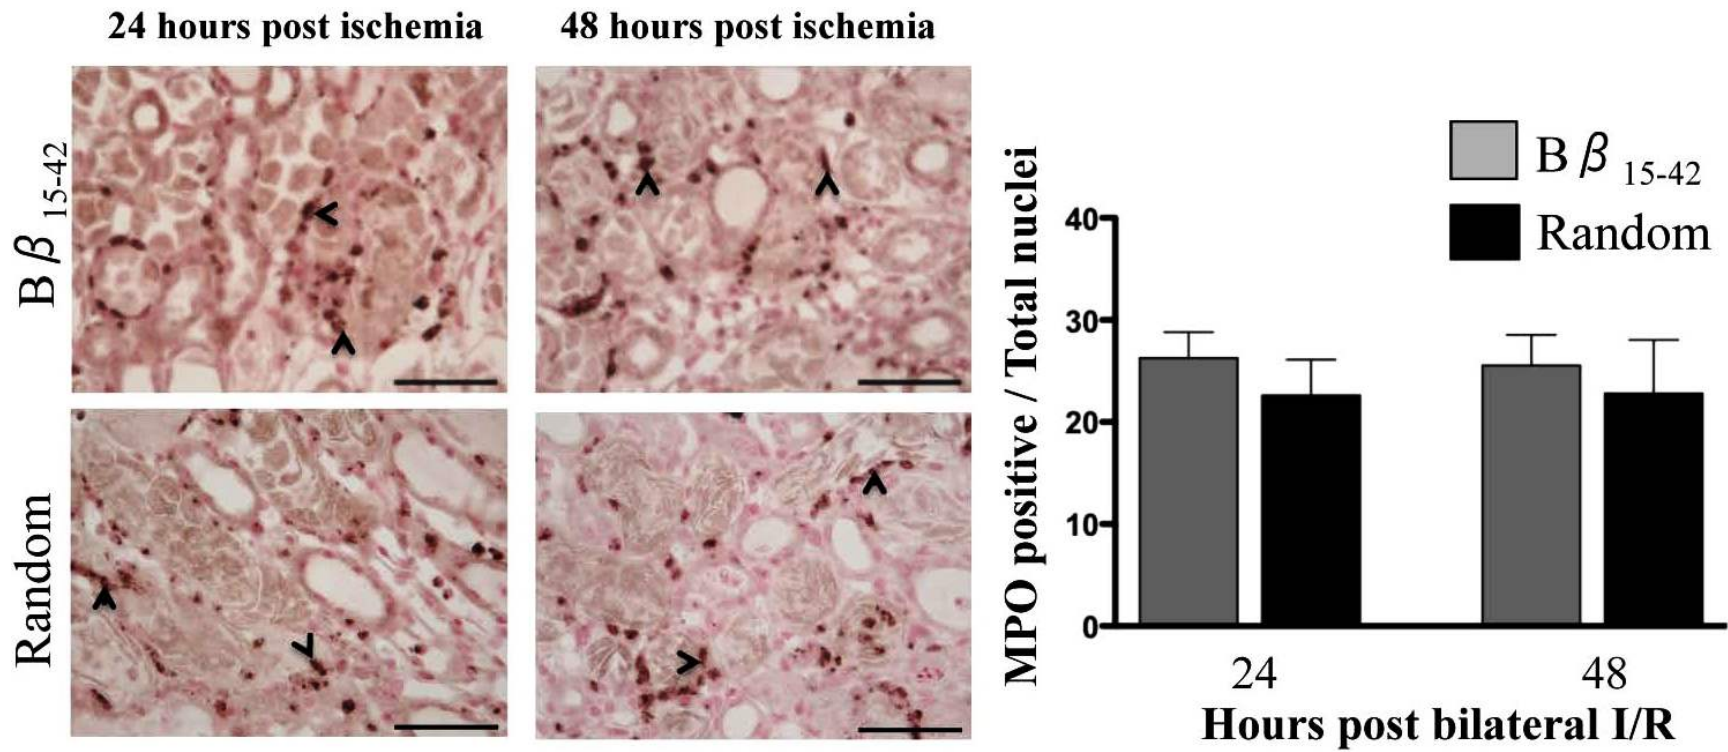

**Figure S6. Representative photomicrographs of myeloperoxidase immunostained kidneys of Bβ<sub>15-42</sub> and random peptide administered groups of mice at 24 and 48 h post 27 min ischemia**  
 Bar represents 50μm.

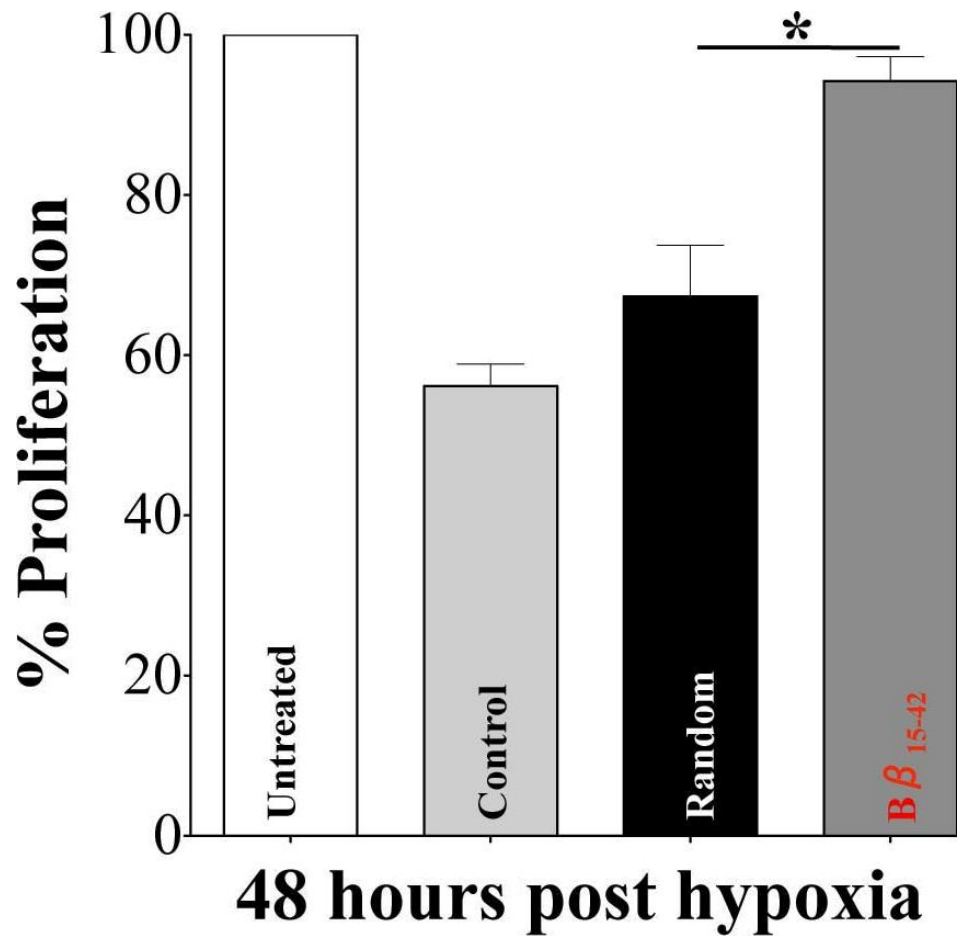

**Figure S7. Graphical representation of cell proliferation measured by bromodeoxyuridine (5-bromo-2-deoxyuridine (BrdU) uptake, by LLC-PK1 cells, 48 h post onset of hypoxia at 450nm wavelength**

Absorbance obtained from untreated cells was taken as 100% (n=6 wells/group). \* represents  $p < 0.05$  as determined by Student's t-test between the two groups.
